# Supplementary material for: Cationic cyanine dyes: impact of symmetry-breaking on optical absorption and third-order polarizabilities
Source: Royal Society of Chemistry journal article supplement (doi:10.1039/c3cp51718g), 2013-01-01
Supplement: c3cp51718g.pdf [file c3cp51718g.pdf]

# Cationic Cyanine Dyes: Impact of Symmetry-Breaking on Optical Absorption and Third-Order Polarizabilities

Kada Yesudas\*

*School of Chemistry, Indian Institute of Science Education and Research, Thiruvananthapuram,  
Kerala – 695 016, India*

\* Corresponding Author: [yesudas.kada@gmail.com](mailto:yesudas.kada@gmail.com)

## Supporting Information

Figure S1: Energy differences between symmetric and asymmetric structures of **1-*n*** cyanine series as a function of *n* obtained at HF/6-31G\*\* level.

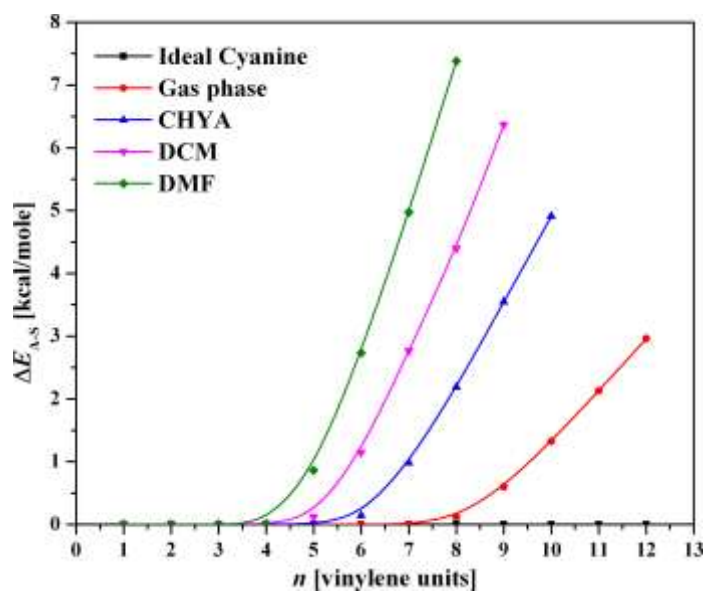

Figure S2: The solitonic structure (top) and local bond length alternations (bottom) of the bare cyanine ( $n = 50$  and  $60$ ) obtained at M06-HF/6-31G\*\* level.

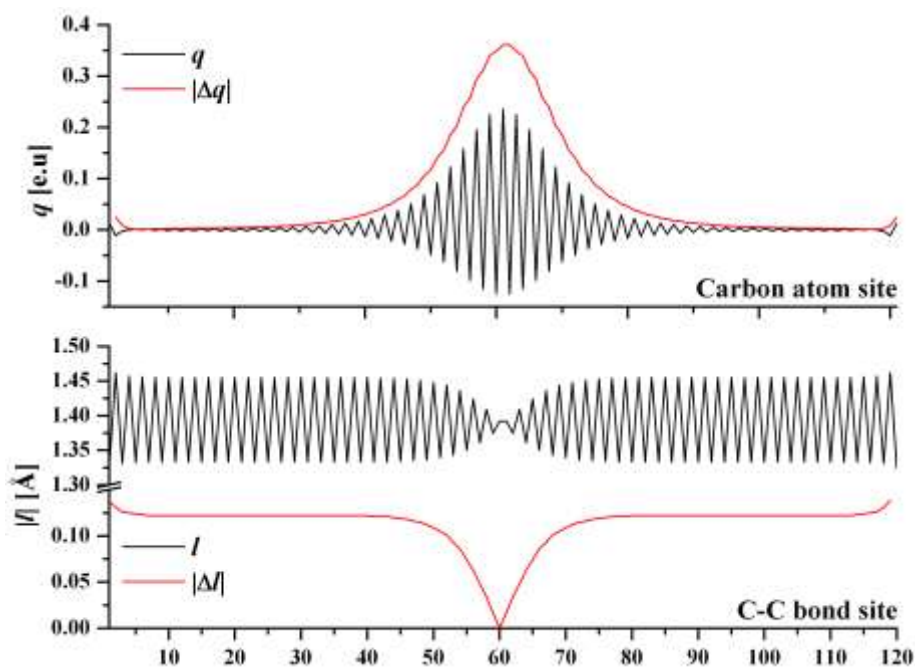

Figure S3: Comparison of the static average third-order polarizabilities ( $\langle\langle\gamma\rangle\rangle$ ) obtained at INDO/MRD-CIS and SAC-CI/6-31G\*\* for  $1-n$  and  $2-n$  series of cyanines as a function of  $n$ .

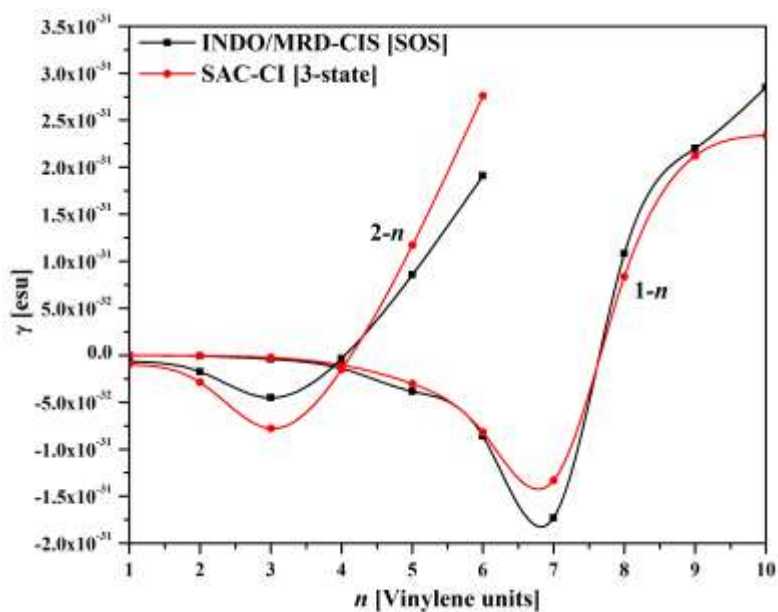

Table S1: Comparison of  $S_0 \rightarrow S_1$  transition energies ( $E_{01}$ , eV), oscillator strengths ( $f$ ) and transition dipole moments ( $\mu_{01}$ , Debye) obtained from INDO/MRD-CIS, SAC-CI/6-31G\*\* and TD-B3LYP/6-31G\*\* level along with the available experimental values ( $E_{01}^{\text{expt}}$ , eV).

| $n$                            | INDO/MRD-CIS |       |            | SAC-CI/6-31G** |       |            | TD-B3LYP/6-31G** |       |            | $E_{01}^{\text{expt}}$  |
|--------------------------------|--------------|-------|------------|----------------|-------|------------|------------------|-------|------------|-------------------------|
|                                | $E_{01}$     | $f$   | $\mu_{01}$ | $E_{01}$       | $f$   | $\mu_{01}$ | $E_{01}$         | $f$   | $\mu_{01}$ |                         |
| <b>1-<math>n</math> series</b> |              |       |            |                |       |            |                  |       |            |                         |
| 1                              | 3.39         | 0.856 | 8.1        | 4.17           | 0.837 | 7.3        | 4.87             | 0.947 | 7.2        | 3.99(0.69) <sup>a</sup> |
| 2                              | 2.54         | 1.201 | 11.1       | 2.87           | 1.079 | 10.0       | 3.89             | 1.418 | 9.8        | 2.98(1.08) <sup>a</sup> |
| 3                              | 2.01         | 1.543 | 14.2       | 2.11           | 1.215 | 12.3       | 3.29             | 1.874 | 12.2       | 2.39(1.23) <sup>a</sup> |
| 4                              | 1.68         | 1.812 | 16.8       | 1.81           | 1.454 | 14.6       | 2.88             | 2.320 | 14.6       | 1.98(1.5) <sup>a</sup>  |
| 5                              | 1.44         | 2.054 | 19.4       | 1.54           | 1.633 | 16.7       | 2.57             | 2.757 | 16.8       | 1.69 <sup>a</sup>       |
| 6                              | 1.28         | 2.282 | 21.7       | 1.31           | 1.730 | 18.7       | 2.33             | 3.179 | 19.0       | 1.46 <sup>a</sup>       |
| 7                              | 1.15         | 2.474 | 23.8       | 1.17           | 1.863 | 20.5       | 2.14             | 3.581 | 21.0       |                         |
| 8                              | 1.13         | 1.788 | 20.4       | 1.10           | 1.523 | 18.7       | 1.79             | 2.550 | 19.4       |                         |
| <b>2-<math>n</math> series</b> |              |       |            |                |       |            |                  |       |            |                         |
| 1                              | 1.89         | 1.776 | 15.7       | 1.98           | 1.933 | 16.0       | 2.29             | 1.821 | 14.5       | 1.64 <sup>b</sup>       |
| 2                              | 1.69         | 2.214 | 18.6       | 1.68           | 2.226 | 18.7       | 2.10             | 2.404 | 17.4       | 1.41 <sup>b</sup>       |
| 3                              | 1.49         | 2.589 | 21.4       | 1.48           | 2.518 | 21.2       | 1.94             | 2.940 | 20.0       | 1.24 <sup>b</sup>       |
| 4                              | 1.40         | 2.853 | 21.4       | 1.36           | 2.030 | 19.9       | 1.72             | 2.890 | 21.0       |                         |

The values in the parenthesis correspond to the oscillator strengths obtained experimentally.

<sup>a</sup>Ref.[1], <sup>b</sup>Ref.[2].

## References

1. W. Werncke, M. Pfeiffer, A. Lau, W. Grahn, H. H. Johannes and L. Dahne, *J. Opt. Soc. Am. B*, 1998, **15**, 863-870.
2. W. Werncke, M. Pfeiffer, T. Johr, A. Lau, W. Grahn, H. H. Johannes and L. Dähne, *Chem. Phys.*, 1997, **216**, 337-347.
